# Supplementary material
Source: publisher figshare collection journal article supplement (https://frontiersin.figshare.com/ndownloader/files/14119976)
Supplement: Supplementary file 1 [file 14119976]

| Month | Site | Habitat | Sample  Size (n) | Canopy biomass  (g dry weight m-2) | | |
| --- | --- | --- | --- | --- | --- | --- |
| June | Goodwin | *R. maritima* | 5 | 63.30 | ± | 7.31 |
| *Z. marina* | 5 | 302.92 | ± | 43.23 |
| Mobjack | *R. maritima* | 5 | 53.75 | ± | 12.59 |
| *Z. marina* | 5 | 135.10 | ± | 33.41 |
| Poquoson | *R. maritima* | 5 | 36.61 | ± | 10.48 |
| *Z. marina* | 5 | 186.36 | ± | 13.67 |
| August | Goodwin | *R. maritima* | 5 | 52.26 | ± | 5.42 |
| *Z. marina* | 5 | 47.26 | ± | 14.15 |
| Mobjack | *R. maritima* | 5 | 19.89 | ± | 4.26 |
| *Z. marina* | 5 | 0.001 | ± | 0 |
| Poquoson | *R. maritima* | 5 | 19.03 | ± | 7.46 |
| *Z. marina* | 5 | 46.69 | ± | 10.47 |
